# Supplementary material
Source: MDPI journal article supplement (https://www.mdpi.com/2076-3417/13/22/12256)
Supplement: s1 [file s1]

Analyses of flavonoids and phenolic acids were made by Reversed Phase-High Performance Liquid Chromatography (RP-HPLC), while the content of anthocyanins with the use of High Performance Liquid Chromatography (HPLC). The detailed procedure information can be found in our previous work cited in the reference list: Borczak, B.; Sikora, M.; Kapusta-Duch, J.; Fołta, M.; Szewczyk, A.; Zięć, G.; Doskočil, I.; Leszczyńska, T. Antioxidative Properties and Acrylamide Content of Functional Wheat-Flour Cookies Enriched with Wild-Grown Fruits. *Molecules* 2022, 27, 5531. <https://doi.org/10.3390/molecules27175531> [3].

**Table S1.** Total polyphenols, polyphenolic compounds' profile, antioxidant activity and acrylamide content of the tested cookies [3].

|                                                    | <b>Chokeberry</b><br>( <i>Aronia melanocarpa</i> ) | <b>Wild rose</b><br>( <i>Rosa canina</i> L.) | <b>Elderberry</b><br>( <i>Sambucus nigra</i> L.) | <b>Hawthorn</b><br>( <i>Crataegus</i> L.) | <b>Rowan</b><br>( <i>Sorbus aucuparia</i> L.) | <b>Sea-buckthorn</b><br>( <i>Hippophae rhamnoides</i> L.) | <b>Control</b>          |
|----------------------------------------------------|----------------------------------------------------|----------------------------------------------|--------------------------------------------------|-------------------------------------------|-----------------------------------------------|-----------------------------------------------------------|-------------------------|
| <b>Total polyphenols (mg·100g<sup>-1</sup> dm)</b> | 165.31±1.2 <sup>b</sup>                            | 256.44±1.0 <sup>a</sup>                      | 144.69±0.5 <sup>c</sup>                          | 139.52±0.7 <sup>e</sup>                   | 149.66±1.6 <sup>d</sup>                       | 98.66±0.4 <sup>f</sup>                                    | 91.26±1.50 <sup>g</sup> |
| <b>Phenolic acids (μg·100g<sup>-1</sup> dm)</b>    |                                                    |                                              |                                                  |                                           |                                               |                                                           |                         |
| neochlorogenic acid                                | 919.28±4.85 <sup>a</sup>                           | nd                                           | nd                                               | 178.03±0.14 <sup>b</sup>                  | 5366.52±12.11 <sup>c</sup>                    | nd                                                        | nd                      |
| protocatechuic acid                                | 269.20±0.62 <sup>a</sup>                           | 59.33±0.29 <sup>b</sup>                      | 131.23±0.72 <sup>c</sup>                         | 33.59±0.29 <sup>d</sup>                   | 2244.69±0.90 <sup>c</sup>                     | nd                                                        | 23.72±0.01 <sup>e</sup> |
| chlorogenic acid                                   | 1026.18±4.94 <sup>a</sup>                          | nd                                           | nd                                               | 113.59±1.23 <sup>b</sup>                  | nd                                            | 51.00±0.87 <sup>d</sup>                                   | nd                      |
| cinnamic acid                                      | 3.32±1.85 <sup>a</sup>                             | nd                                           | nd                                               | nd                                        | 77.18±0.04 <sup>b</sup>                       | nd                                                        | nd                      |
| caffeic acid                                       | nd                                                 | nd                                           | nd                                               | nd                                        | nd                                            | nd                                                        | nd                      |
| vanillic acid                                      | nd                                                 | nd                                           | nd                                               | nd                                        | nd                                            | nd                                                        | 42.71±0.18              |
| <b>Flavanols (μg·100g<sup>-1</sup> dm)</b>         |                                                    |                                              |                                                  |                                           |                                               |                                                           |                         |
| catechin                                           | 21.82±1.23 <sup>ab</sup>                           | 45.60±20.17 <sup>b</sup>                     | 14.05±0.12 <sup>a</sup>                          | 23.73±1.23 <sup>ab</sup>                  | nd                                            | 11.70±0.52 <sup>a</sup>                                   | nd                      |
| epicatechin                                        | 792.48±0.53 <sup>a</sup>                           | nd                                           | nd                                               | 823.86±6.58 <sup>b</sup>                  | nd                                            | nd                                                        | nd                      |
| <b>Flavonols (μg·100g<sup>-1</sup> dm)</b>         |                                                    |                                              |                                                  |                                           |                                               |                                                           |                         |
| quercetin                                          |                                                    |                                              |                                                  |                                           |                                               |                                                           |                         |
| quercetin-3-galactoside (hyperoside)               | 202.66±1.71 <sup>a</sup>                           | 163.82±0.29 <sup>b</sup>                     | 156.04±0.23 <sup>c</sup>                         | 133.01±0.07 <sup>d</sup>                  | 19.05±0.18 <sup>e</sup>                       | 200.73±0.76 <sup>f</sup>                                  | nd                      |
| kaempferol-7-O-glucoside (populnin)                | 237.19±3.17 <sup>a</sup>                           | 156.33±0.98 <sup>b</sup>                     | nd                                               | 309.04±0.47 <sup>c</sup>                  | 77.18±0.45 <sup>d</sup>                       | 190.86±1.79 <sup>e</sup>                                  | nd                      |
| rutin                                              | nd                                                 | 743.44±17.35                                 | nd                                               | nd                                        | nd                                            | nd                                                        | nd                      |
|                                                    | 461.74±10.92 <sup>a</sup>                          | 100.60±5.05 <sup>b</sup>                     | 1083.20±1.40 <sup>c</sup>                        | 133.04±0.08 <sup>d</sup>                  | 126.34±0.80 <sup>e</sup>                      | 304.96±2.06 <sup>f</sup>                                  | nd                      |
| <b>Flavones (μg·100g<sup>-1</sup> dm)</b>          |                                                    |                                              |                                                  |                                           |                                               |                                                           |                         |
| apigenin-8-C-glucoside (vitexin)                   | nd                                                 | nd                                           | nd                                               | 166.59±2.19                               | nd                                            | nd                                                        | nd                      |
|                                                    | nd                                                 | nd                                           | nd                                               | nd                                        | nd                                            | 294.36±0.26                                               | nd                      |

|                                                                                       |                               |                                |                                |                                |                                |                                |                                 |
|---------------------------------------------------------------------------------------|-------------------------------|--------------------------------|--------------------------------|--------------------------------|--------------------------------|--------------------------------|---------------------------------|
|                                                                                       |                               |                                |                                |                                |                                |                                |                                 |
|                                                                                       |                               |                                |                                |                                |                                |                                |                                 |
| luteolin 7-O-glucoside (cynaroside)                                                   |                               |                                |                                |                                |                                |                                |                                 |
| <b>Anthocyanins (<math>\mu\text{g}\cdot 100\text{g}^{-1}\text{ dm}</math>)</b>        |                               |                                |                                |                                |                                |                                |                                 |
| cyanidin-3-glucoside                                                                  | 78.05 $\pm$ 0.36              | nd                             | nd                             | nd                             | nd                             | nd                             | nd                              |
| (idaein)                                                                              | nd                            | nd                             | 376.1 $\pm$ 11.42 <sup>a</sup> | 279.95 $\pm$ 3.31 <sup>b</sup> | nd                             | nd                             | nd                              |
| cyanidin-3-O-glucoside (kuromanine)                                                   |                               |                                |                                |                                |                                |                                |                                 |
| <b>Antioxidant activity</b>                                                           |                               |                                |                                |                                |                                |                                |                                 |
| ABTS ( $\mu\text{mol}\cdot\text{g}^{-1}\text{ dm}$ )                                  | 15.22 $\pm$ 0.05 <sup>a</sup> | 5.38 $\pm$ 0.04 <sup>d</sup>   | 9.42 $\pm$ 0.01 <sup>b</sup>   | 7.58 $\pm$ 0.01 <sup>c</sup>   | 7.61 $\pm$ 0.05 <sup>c</sup>   | 4.99 $\pm$ 0.03 <sup>e</sup>   | 1.11 $\pm$ 0.00 <sup>f</sup>    |
| FRAP ( $\mu\text{mol}\cdot\text{g}^{-1}\text{ dm}$ )                                  | 17.47 $\pm$ 0.05 <sup>b</sup> | 26.12 $\pm$ 0.83 <sup>a</sup>  | 11.37 $\pm$ 0.17 <sup>e</sup>  | 12.30 $\pm$ 0.17 <sup>d</sup>  | 13.66 $\pm$ 0.16 <sup>c</sup>  | 9.83 $\pm$ 0.27 <sup>f</sup>   | 2.46 $\pm$ 0.08 <sup>g</sup>    |
| <b>Acrylamide content (<math>\mu\text{g}\cdot 1000\text{g}^{-1}\text{ dm}</math>)</b> | 81.98 $\pm$ 0.95 <sup>a</sup> | 173.90 $\pm$ 0.54 <sup>d</sup> | 120.26 $\pm$ 1.09 <sup>b</sup> | 524.96 $\pm$ 1.98 <sup>f</sup> | 370.63 $\pm$ 1.76 <sup>e</sup> | 136.06 $\pm$ 0.65 <sup>c</sup> | 1290.77 $\pm$ 1.23 <sup>g</sup> |

The results were presented as mean  $\pm$  sd. The values of the superscript with different letters in rows are significantly different at  $p < 0.05$ ; nd-not detected.
